# Supplementary material for: Effectiveness of the conservation areas on the Mornington Peninsula for the common resident shorebird species using citizen science data
Source: PLoS One. 2022 May 4;17(5):e0267203. doi: 10.1371/journal.pone.0267203 (PMC9067883; doi:10.1371/journal.pone.0267203)
Supplement: S1 File — (R) [file pone.0267203.s004.R]

#install.packages("INLA",repos=c(getOption("repos"),INLA="https://inla.r-inla-download.org/R/stable"), dep=TRUE)

library(dplyr); library(data.table); library(plyr); library(ggplot2)
library(INLA); library(sf); library(rgeos); require(reshape2)

### Import dataset ###

Atlas <- read.csv("C:/Users/Download/Study Dataset.csv", fileEncoding="UTF-8-BOM")

################################################################################################################
#Data Preparation
################################################################################################################

nyears = 10
nspecies = 6

## Annual dataset ##
Yearly <- aggregate(Count ~ Vernacular_name + Year, Atlas, FUN = sum)
Yearly$ID <- paste(Yearly$Vernacular_name, Yearly$Year, sep = "-", collapse = NULL)
Yearly <- Yearly[order(Yearly$ID),]
setnames(Yearly, old=c("Vernacular_name"), new=c("sp"))

Annual <- data.frame(sp = rep(c("Australian Pied Oystercatcher", "Black-fronted Dotterel", 
                   "Red-capped Dotterel", "Red-kneed Dotterel", "Masked Lapwing",
                   "Sooty Oystercatcher"), each = nyears))
Annual$Year = rep(2010:2019, 6)
Annual$ID <- paste(Annual$sp, Annual$Year, sep = "-", collapse = NULL)
Final1 <- join(Annual, Yearly, by = "ID", type = "left", match = "all")
Final1 <- Final1[,c(1:3,6)]

## Create protected area models annual dataset ##
Protected <- aggregate(Count ~ Vernacular_name + Year + Protected, Atlas, FUN = sum)
Protected$ID <- paste(Protected$Vernacular_name, Protected$Year, Protected$Protected, sep = "-", collapse = NULL)
Protected <- Protected[order(Protected$ID),]
setnames(Protected, old=c("Vernacular_name"), new=c("sp"))

Annual1 <- Annual[rep(seq_len(nrow(Annual)), each = 2), ]
Annual1$Protected <- rep(0:1, nrow(Annual))
Annual1$ID <- paste(Annual1$sp, Annual1$Year, Annual1$Protected, sep = "-", collapse = NULL)
Final2 <- join(Annual1, Protected, by = "ID", type = "left", match = "all")
Final2 <- Final2[,c(1:4,8)]

################################################################################################################
#INLA modelling
################################################################################################################

## species model ##

fit <- inla(Y ~ 1 + sp * year + f(effect, model="ar1"),
            data = list(Y = Final1$Count, year = rep(1:nyears, nspecies), sp = as.factor(Final1$sp), 
                        effect = rep(1:nyears, nspecies)),
            family = c("poisson"), 
            control.compute = list(dic = TRUE, waic = TRUE, cpo = TRUE, config = TRUE))

round(fit$summary.fixed[c(1:3,5)], digits = 3)
fit$dic$dic;fit$waic$waic

## Protected models ##

X <- split(Final2, Final2$sp)

fit <- lapply(seq_along(X), function(x)
       inla(y ~ 1 + year * protected + f(effect, model = "ar1"),
       data = data.frame(y = X[[x]]$Count, year = rep(1:nyears, each = 2), effect = rep(1:nyears, each = 2), 
                         protected = as.factor(Final2$Protected[1:20])), 
       family = "poisson", 
       control.family = list(link = "log"),
       control.compute = list(dic = TRUE, waic = TRUE, cpo = TRUE, config = TRUE)))

lapply(seq_along(X), function(x) round(fit[[x]]$summary.fixed[c(1:3,5)], digits = 3))
lapply(seq_along(X), function(x) fit[[x]]$dic$dic)
